# Supplementary material for: Mapping the structure and biological functions within mesenchymal bodies using microfluidics
Source: PubMed Central journal article supplement — Sci Adv. 2020 Mar 4;6(10):eaaw7853. doi: 10.1126/sciadv.aaw7853 (PMC7056316; doi:10.1126/sciadv.aaw7853), 2020-03-04
Supplement: aaw7853_SM.pdf [file aaw7853_SM.pdf]

## Supplementary Materials for

### Mapping the structure and biological functions within mesenchymal bodies using microfluidics

Sébastien Sart, Raphaël F.-X. Tomasi, Antoine Barizien, Gabriel Amselem, Ana Cumano, Charles N. Baroud\*

\*Corresponding author. Email: charles.baroud@pasteur.fr

Published 4 March 2020, *Sci. Adv.* **6**, eaaw7853 (2020)

DOI: 10.1126/sciadv.aaw7853

#### The PDF file includes:

- Table S1. Flow rate for cell loading and phase exchange.
- Table S2. Primer sequences.
- Table S3. Small molecules for the inhibition of molecular pathways regulating hMSC behavior; the concentrations used in this study are adapted from (59, 60).
- Table S4. Statistical tests and *P* values.
- Fig. S1. Characterization of the hMSC population.
- Fig. S2. Formation of MBs on chip.
- Fig. S3. Structural organization in MBs.
- Fig. S4. Intra-MB analysis of the COX-2 signal with concentric cell layers.
- Fig. S5. Validation of the fluorescence signal patterns.
- Fig. S6. Hypoxia analysis within MBs.
- Fig. S7. Intra-MB fluorescence signal distribution in individual chip.
- Fig. S8. Ratio of Casp3<sup>+</sup> cells per MB formed with QNZ ( $n_{\text{MBs}} = 1216$ ), DAPT ( $n_{\text{MBs}} = 658$ ), Y27 ( $n_{\text{MBs}} = 709$ ), and CytoD ( $n_{\text{MBs}} = 458$ ).

#### Other Supplementary Material for this manuscript includes the following:

(available at [advances.sciencemag.org/cgi/content/full/6/10/eaaw7853/DC1](https://advances.sciencemag.org/cgi/content/full/6/10/eaaw7853/DC1))

- Movie S1 (.avi format). Time lapse of MB formation.
- Movie S2 (.avi format). Morphology of MB in 3D.
- Movie S3 (.avi format). Representative *z* stack (from the bottom to the median plan of the MBs) acquired using a spinning disc confocal microscopy showing the distribution of de CD146<sup>dim</sup> (Vibrant Dil, green) and CD146<sup>bright</sup> (Vibrant DiO, red) within MBs.

**Table S1. Flow rate for cell loading and phase exchange.**

| <b>Step</b>        | <b>Liquid loader</b> | <b>Flow rate (<math>\mu\text{l}/\text{min}</math>)</b> | <b>Approximate delivered volume (<math>\mu\text{L}</math>)</b> |
|--------------------|----------------------|--------------------------------------------------------|----------------------------------------------------------------|
| Cell loading       | Chamber              | 50                                                     | 150                                                            |
|                    | Junction             | 13                                                     | 40                                                             |
|                    | Cells                | 8 - 8.4                                                | 25                                                             |
| Surfactant washing | Exit of the chamber  | 80                                                     | 2000                                                           |
| Culture medium     | Exit of the chamber  | 4                                                      | 100                                                            |

**Table S2. Primer sequences.**

| <b>Gene</b>    | <b>Orientation</b> | <b>Sequence</b>          | <b>Product size (bp)</b> | <b>Tm (°C)</b> |
|----------------|--------------------|--------------------------|--------------------------|----------------|
| TSG-6          | Forward            | AAGCACGGTCTGGCAAATACAAGC | 139                      | 60             |
|                | Reverse            | ATCCATCCAGCAGCACAGACATGA |                          |                |
| Cox-2          | Forward            | ACTCTGGCTAGACAGCGTAA     | 145                      | 60             |
|                | Reverse            | ACCGTAGATGCTCAGGGAC      |                          |                |
| STC-1          | Forward            | GCTTAAAATGCATCGCCAAC     | 273                      | 60             |
|                | Reverse            | TTTTCTCCATCAGGCTGTCTC    |                          |                |
| VEGF-A         | Forward            | GCACCCATGGCAGAAGG        | 90                       | 60             |
|                | Reverse            | CTCGATTGGATGGCAGTAGCT    |                          |                |
| RUNX-2         | Forward            | AGATGATGACACTGCCACCTCTG  | 125                      | 60             |
|                | Reverse            | GGGATGAAATGCTTGGGAACT    |                          |                |
| CEBP/ $\alpha$ | Forward            | GAGGGACCGGAGTTATGACA     | 130                      | 60             |
|                | Reverse            | TGGTGGTTTAGCAGAGACGC     |                          |                |
| SOX-9          | Forward            | CATGAGCGAGGTGCACTCC      | 112                      | 60             |
|                | Reverse            | TCGCTTCAGGTCAGCCTTG      |                          |                |
| GADPH          | Reverse            | CTCGATTGGATGGCAGTAGCT    | 207                      | 60             |
|                | Forward            | TGATGACATCAAGAAGGTGGTG   |                          |                |

**Table S3. Small molecules for the inhibition of molecular pathways regulating hMSC behavior; the concentrations used in this study are adapted from (59, 60).**

| <b>Small molecule</b> | <b>Manufacturer</b> | <b>Target</b>                                   | <b>Inhibited molecular signaling</b> | <b>Concentration used in this study</b>                  |
|-----------------------|---------------------|-------------------------------------------------|--------------------------------------|----------------------------------------------------------|
| Indomethacin          | Sigma-Aldrich       | COXs                                            | COX-2                                | 10 $\mu$ M (PGE-2 ELISA)<br>or 25 $\mu$ M (VEGF-A ELISA) |
| DAPT                  | Sigma-Aldrich       | $\gamma$ -secretase                             | Notch                                | 50 $\mu$ M                                               |
| QNZ                   | Sigma-Aldrich       | NF- $\kappa$ B<br>transcriptional<br>activation | NF- $\kappa$ B                       | 10 $\mu$ M                                               |
| Cytochalasin D        | Sigma-Aldrich       | Actin monomers                                  | Actin<br>polymerization              | 1 $\mu$ M                                                |
| Y-27632               | Sigma-Aldrich       | ROCK                                            | Formation of<br>stress fibers        | 10 $\mu$ M                                               |

**Table S4. Statistical tests and P values.**

| Figure number | Assumptions                                                                 | Statistical test                                            | P-values                                                                                                                                             |
|---------------|-----------------------------------------------------------------------------|-------------------------------------------------------------|------------------------------------------------------------------------------------------------------------------------------------------------------|
| Fig. 3D       | Normality, independent sample values, equal variances                       | Two-sample t-test                                           | r/R between 0 and 0.2, $p < 1e-4$ ; r/R= 0.3 and r/R = 0.4, $p < 0.01$ ; r/R = 0.35, $p = 0.51$ ; r/R = 0.4, $p = 0.22$                              |
| Fig. 3G       | Normality, independent sample values, equal variances                       | Two-sample t-test                                           | RUNX2: CD146 <sup>dim</sup> vs CD146 <sup>bright</sup> =0.02                                                                                         |
| Fig. 4D       | Normality, independent sample values, equal variances, multiple comparisons | ANOVA, parametric posthoc procedure with Sidak's correction | 1 vs 2: $p < 1e-4$ ; 2 vs 3: $p < 1e-4$ ; 3 vs 4: $p < 1e-4$ ; 4 vs 5: $p < 1e-4$ ; 5 vs 6: $p < 1e-4$ ; 6 vs 7: $p < 1e-4$ ; 7 vs 8: $p = 1.0000$   |
| Fig. 5A       | Normality, independent sample values, equal variances                       | Two-sample t-test                                           | TSG-6: $p = 0.0002$ ; COX-2: $p = 0.0043$ ; STC-1; $p = 0.0012$<br>VEGF; $p=0.04$                                                                    |
| Fig. 5C       | Normality, independent sample values, equal variances, multiple comparisons | ANOVA, posthoc procedure with Sidak's correction            | a. PEG2: 2D vs 3D: $p = 0.001$ ; 3D vs 3D+COX inh: $p = 0.03$<br>b. VEGF: 2D vs 3D: $< 1e-4$ ; 3D vs 3D+COX inh: $p < 1e-4$                          |
| Fig. 5E       | Normality, independent sample values, equal variances, multiple comparisons | ANOVA, parametric posthoc procedure with Sidak's correction | 1 vs 2: $p < 1e-4$ ; 2 vs 3: $p < 1e-4$ ; 3 vs 4: $p < 1e-4$ ; 4 vs 5: $p < 1e-4$ ; 5 vs 6: $p < 1e-4$ ; 6 vs 7: $p = 0.4930$ ; 7 vs 8: $p = 1.0000$ |
| Fig. 5F       | Normality, independent sample values, equal variances, multiple comparisons | ANOVA, parametric posthoc procedure with Sidak's correction | 1 vs 2: $p < 1e-4$ ; 2 vs 3: $p < 1e-4$ ; 3 vs 4: $p < 1e-4$ ; 4 vs 5: $p < 1e-4$ ; 5 vs 6: $p < 1e-4$ ;                                             |
| Fig. 6B       | Independent sample values, known reference                                  | One-sample sign test                                        | QNZ: $p < 1e-4$ ; DAPT: $p = 0.1033$ ; Y27: $p = 0.0001$ ;<br>CytoD: $p < 1e-4$                                                                      |
| Fig. 6C       | Independent sample values, known reference                                  | One-sample sign test                                        | QNZ: $p < 1e-4$ ; DAPT: $p < 1e-4$ ; Y27: $p < 1e-4$ ;<br>CytoD: $p < 1e-4$                                                                          |
| Fig. 6E       | Normality, independent sample                                               | One-sample t-test                                           | QNZ: $p = 0.0502$ ; DAPT: $p = 0.9662$ ; Y27: $p = 0.5176$ ;                                                                                         |

|                       |                                                                             |                                                             |                                                                                                                                                                         |
|-----------------------|-----------------------------------------------------------------------------|-------------------------------------------------------------|-------------------------------------------------------------------------------------------------------------------------------------------------------------------------|
|                       | values, equal variances, known reference                                    |                                                             | CytoD: p = 0.1836                                                                                                                                                       |
| Supplementary Fig. 3C | Same as Fig. 3D                                                             |                                                             |                                                                                                                                                                         |
| Supplementary Fig. 3D | Normality, independent sample values, equal variances, multiple comparisons | ANOVA, parametric posthoc procedure with Sidak's correction | 1 vs 2: p = 1.0000; 2 vs 3: p = 1.0000; 3 vs 4: p = 0.0002; 4 vs 5: p < 1e-4; 5 vs 6: p < 1e-4; 6 vs 7: p < 1e-4; 7 vs 8: p < 1e-4; *v 9: p = 1.0000; 9 vs 10: p < 1e-4 |
| Supplementary Fig. 4A | Independent sample values, known reference                                  | One-sample sign test                                        | DMSO: p = 1.0000; Secondary: p < 1e-4                                                                                                                                   |
| Supplementary Fig. 7  | Independent sample values,                                                  | known reference One-sample t-test                           | QNZ: p = 0.8707; DAPT: p = 0.8133; Y27: p = 0.2687; CytoD: p = 0.1544                                                                                                   |

## SUPPLEMENTARY FIGURES

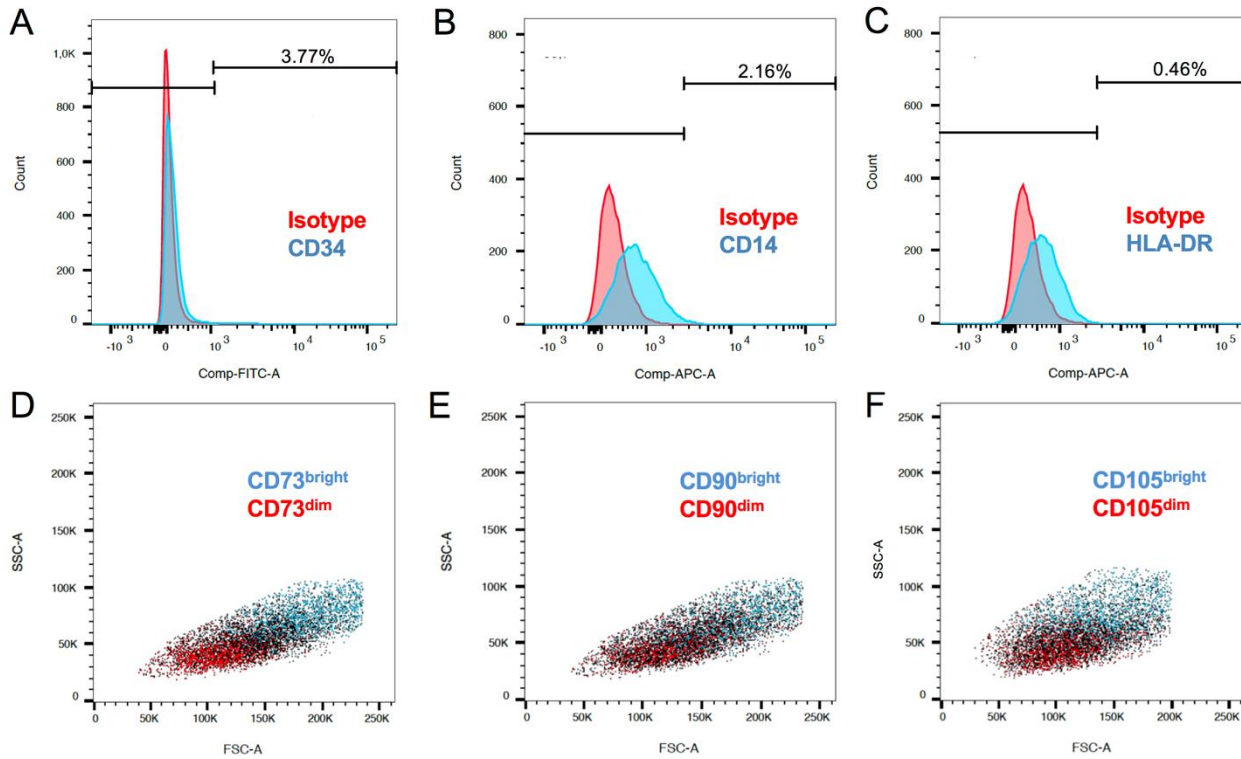

**Fig. S1. Characterization of the hMSC population.** Representative histograms of the percentage of hMSCs expressing CD34 (A), CD14 (B) and HLA-DR (C). Correlation between cell size (FSC and SSC) and level of CD73 (D), CD90 (E) and CD105 (F) expression.

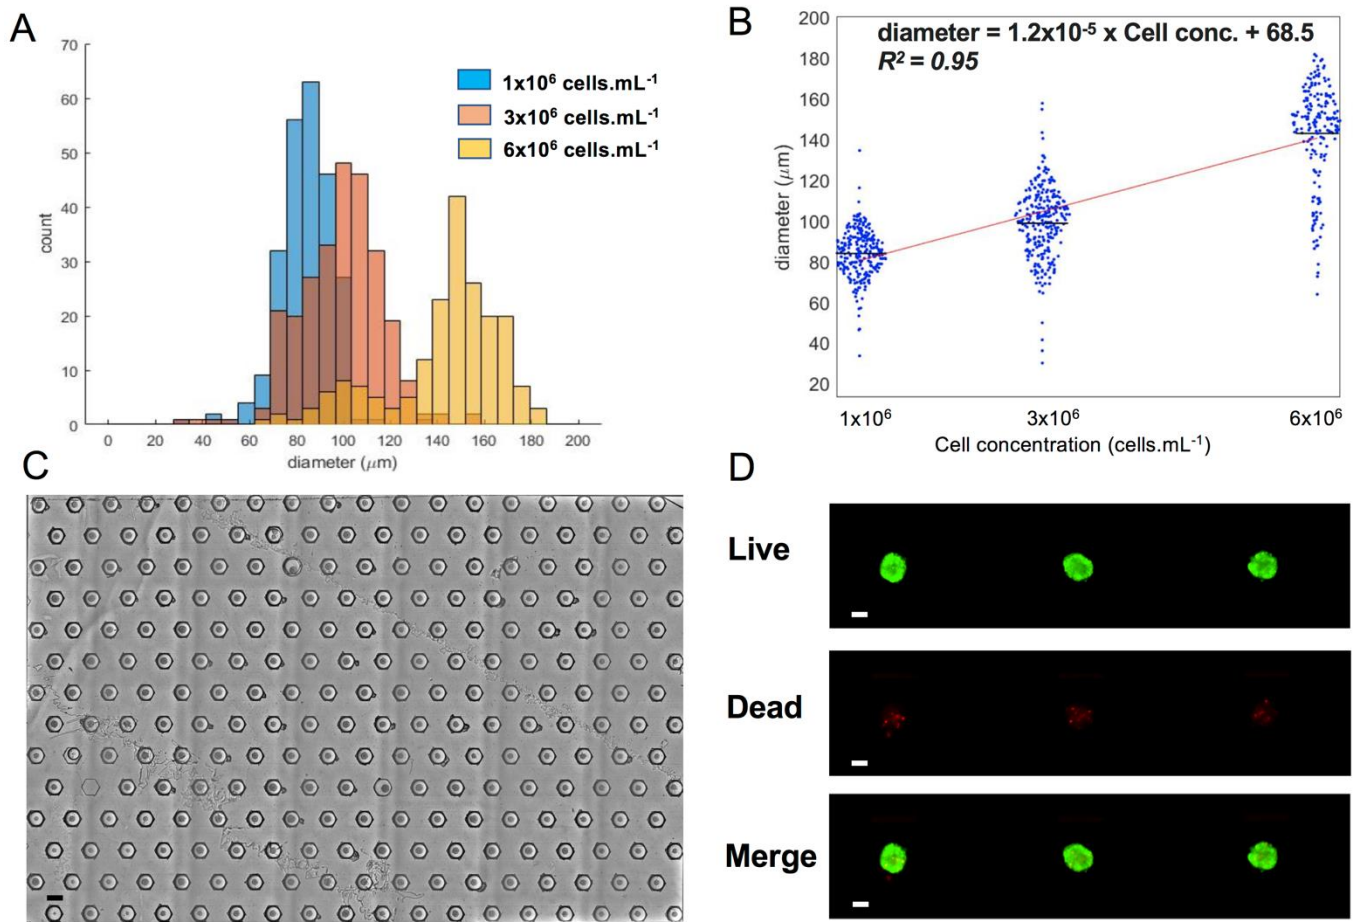

**Fig. S2. Formation of MBs on chip.** Different hMSC concentrations in the seeding solution yield to the formation of MBs with different sizes that increase with the cell concentration (A). There is a linear correlation between the hMSC concentration in the seeding solution and the diameter of the resulting MBs. From the regression curve and considering the monodisperse distribution of the volume of the droplets (50 nL), the average cell number in each droplet is of 380 cells and the C.V. is of 24%. The protocol yields to the formation of just one MBs in each anchor, scale bars are 300  $\mu\text{m}$  (C). Live dead imaging of MBs, scale bars are 100  $\mu\text{m}$  (D). The images were acquired using a widefield microscope.



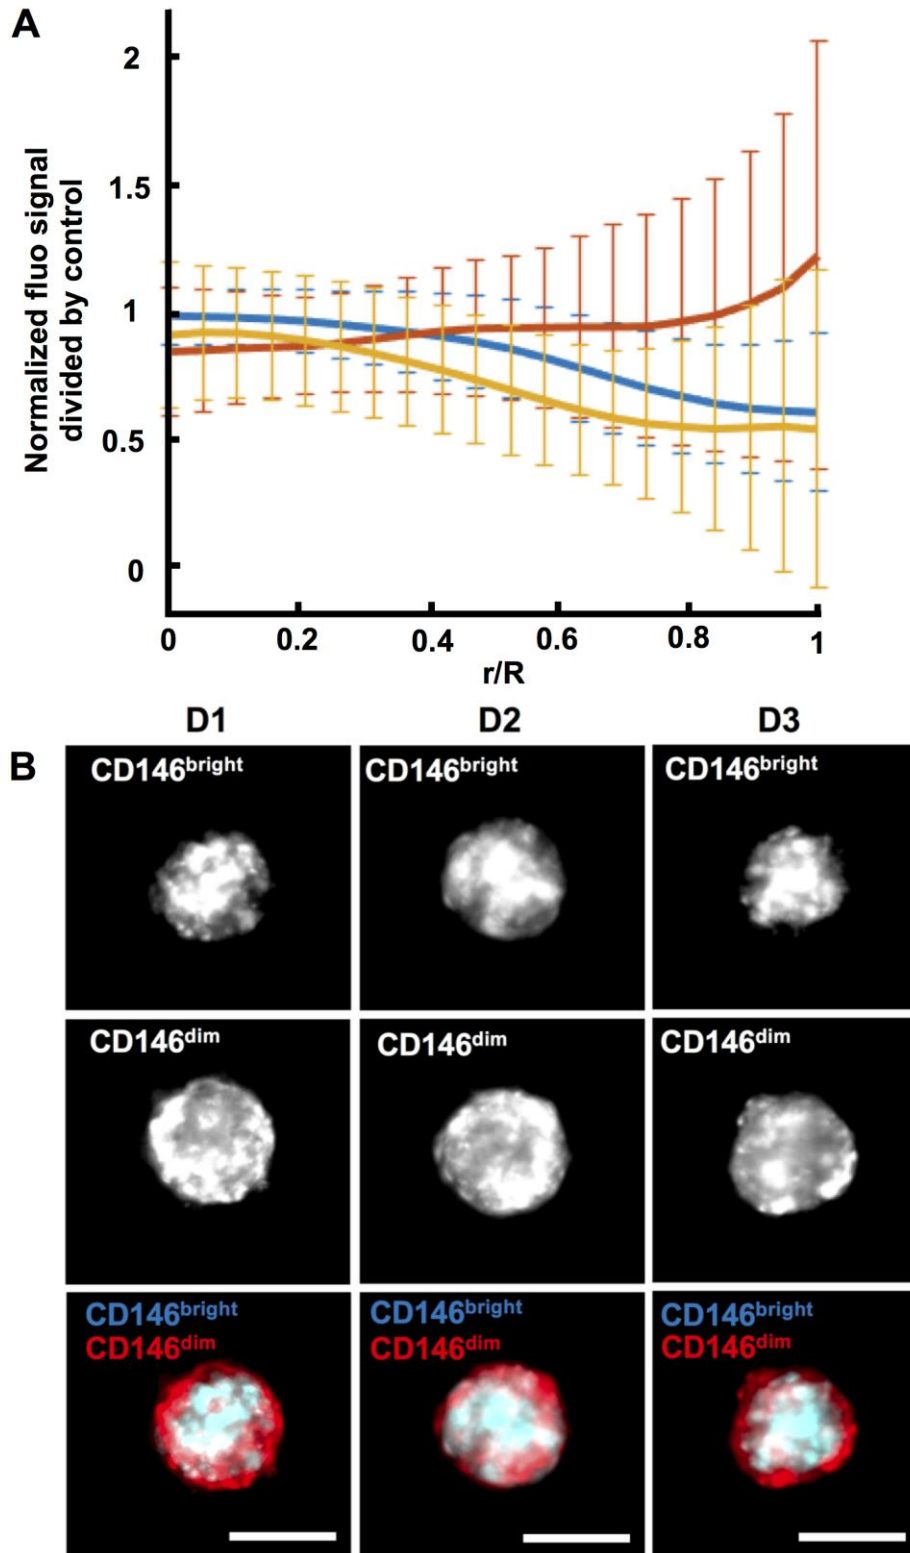

**Fig. S3. Structural organization in MBs.** Radial coordinates of CD146<sup>dim</sup> ( $n_{\text{MBs}} = 85$ , red line), CD146<sup>bright</sup> ( $n_{\text{MBs}} = 500$ , blue line) and the larger cells ( $n_{\text{MBs}} = 120$ , orange line) of the hMSC population in MBs, after Vibrant<sup>®</sup>DIL staining, error bars represent the standard deviation, the images were acquired using a widefield microscope (A). Representative images of the time evolution of the structural organization in MBs from day 1 to day 3 in culture ( $n_{\text{MBs}} = 61$ ) (B). Scale bar are 100  $\mu\text{m}$ .

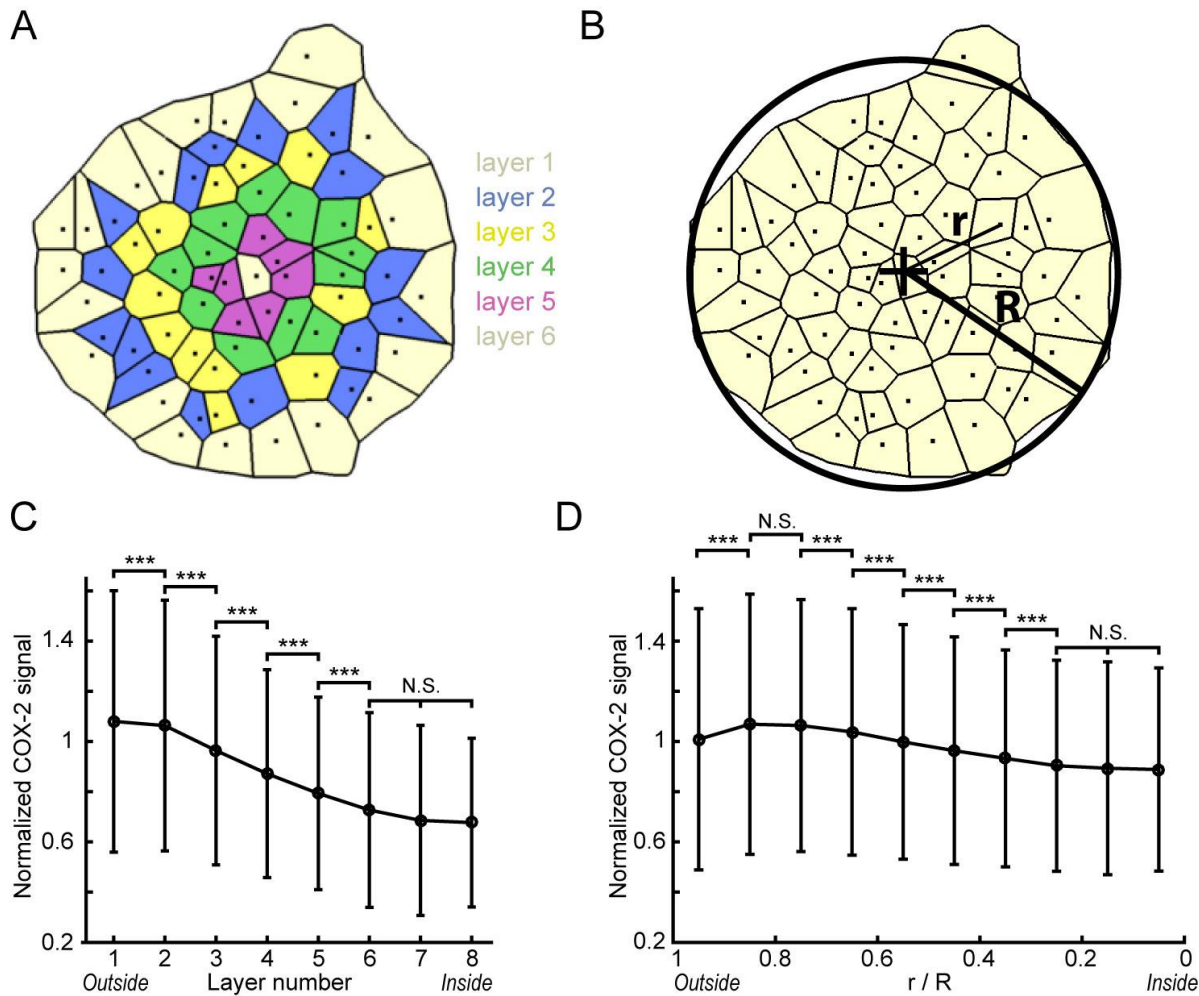

**Fig. S4. Intra-MB analysis of the COX-2 signal with concentric cell layers.** (A-B) Schemes of the same MB where the cell centers are represented by black dots. Black lines show the Voronoi cells. The position of each cell in the MB is described by assigning a cell layer number (A, each color represents a cell layer, layer number 1 being the outermost cell layer) or by computing its normalized distance to the MB center  $r / R$  (B,  $r$  is the distance between the cell center and the MB center and  $R$  is the equivalent radius of the MB). (C-D) Evolution of the normalized cellular COX-2 signal with the cell layer number (C) and the normalized distance to the MB center (D). Black circles and errors bars represent respectively the mean normalized COX-2 signal and the standard deviation of the data.  $N_{\text{chips}} = 13$ ;  $n_{\text{MBs}} = 2,936$ ;  $n_{\text{cells}} = 159,596$ . The layer analysis gives a much clearer trend with a higher COX-2 signal in the layers close to the MB edge, as can be seen in Fig. 5.D-E. The uncertainty of the cell center determination and the fact that two cells of a not perfectly round MB can have different  $r / R$  values even if they belong to the same concentric layer explain why the cell layer assignment is a more accurate determination of the cell location in the MB. \*\*\*:  $p < 0.001$ ; N.S.: non significant.

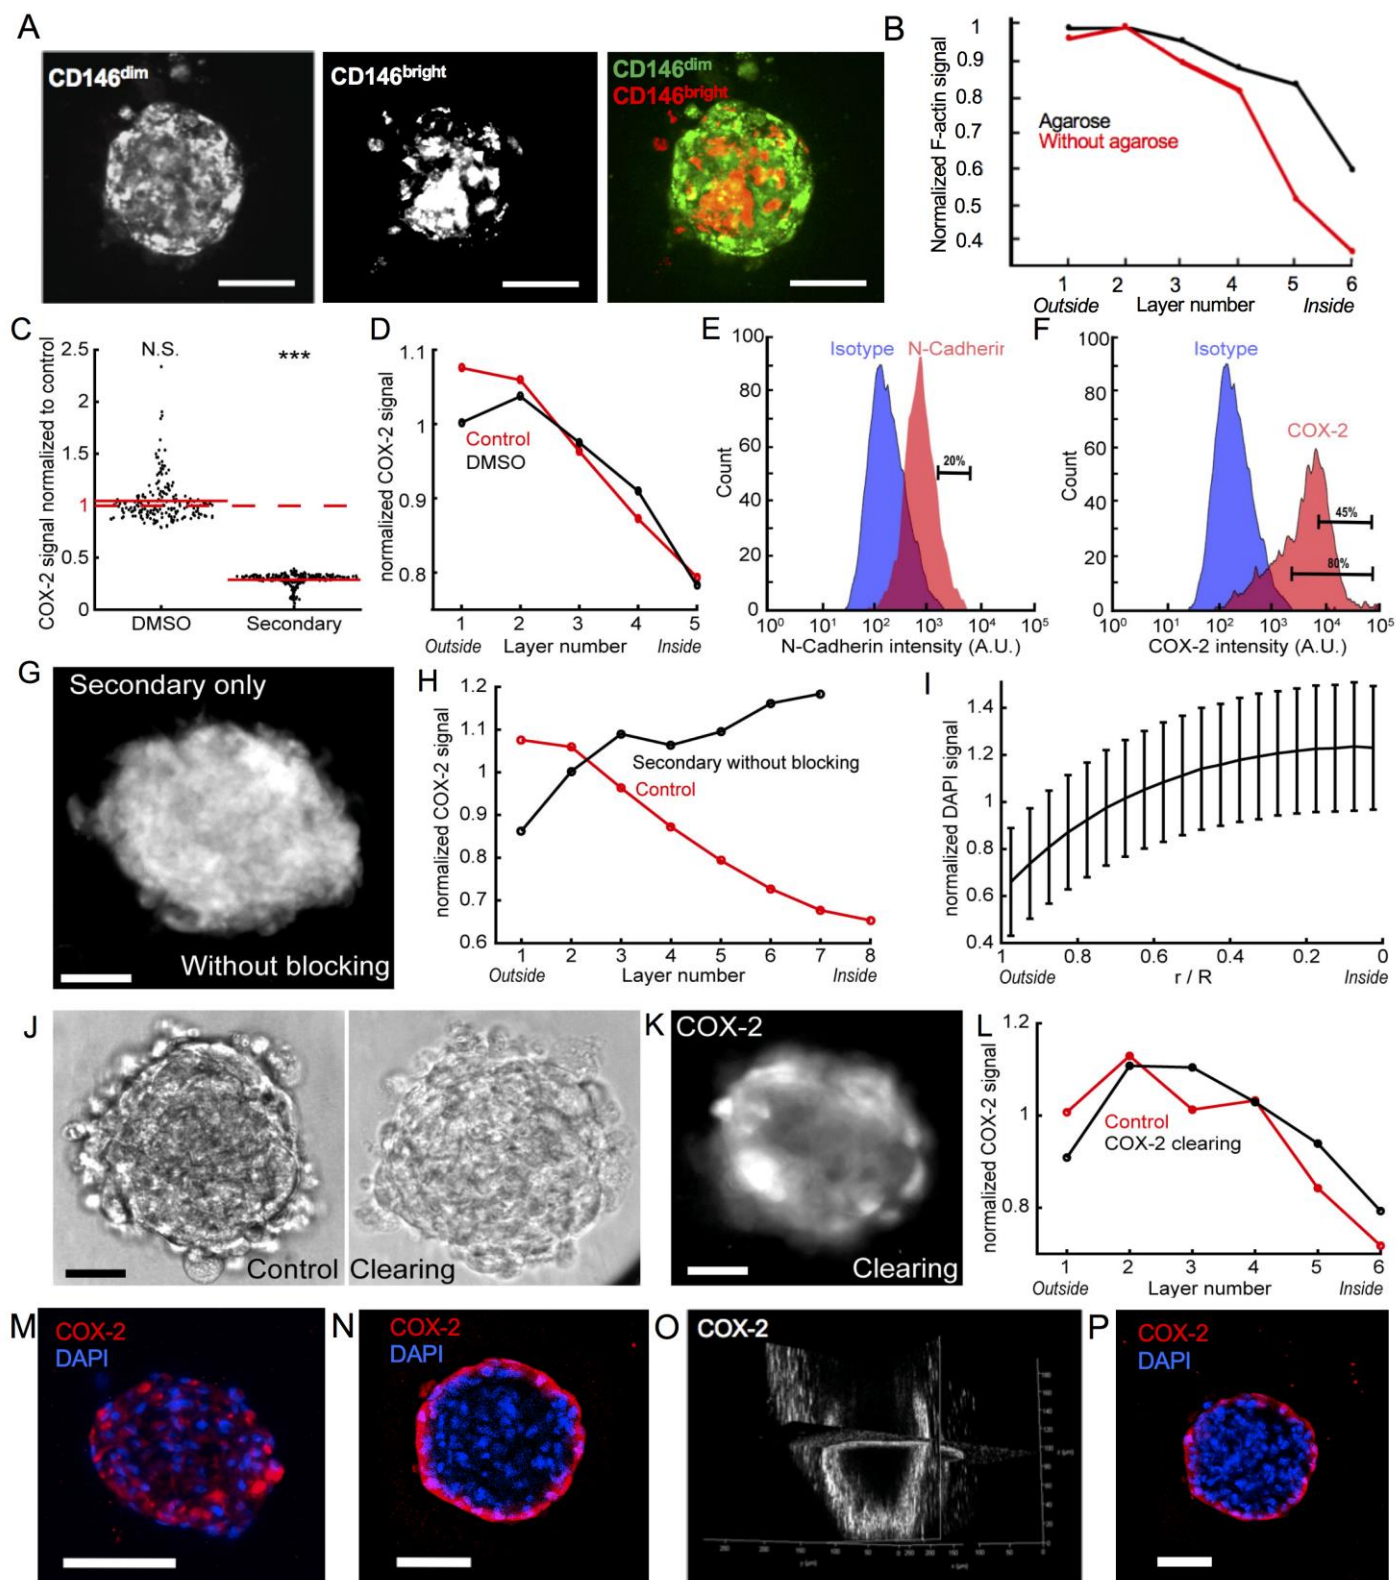

**Fig. S5. Validation of the fluorescence signal patterns.** Representative images of the median plan of MBs formed with CD146<sup>dim</sup> and CD146<sup>bright</sup> stained for Vibrant<sup>®</sup>DIL and Vibrant<sup>®</sup>DIO, using a spinning disc-confocal microscope ( $n_{\text{MBs}} = 100$ ) (A). Distribution of fluorescent signal of F-actin in the cell layers of MBs cultivated with or without agarose (B). (C-D) Specificity of the staining and non-interference of the DMSO. Performing the immunostaining without the primary antibody and staining only with secondary antibody resulted in a very low fluorescent signal, which validated the specificity of the primary antibodies (C, control for secondary:  $N_{\text{chips}} = 1$ ;

$n_{\text{MBs}} = 192$ ; secondary:  $N_{\text{chips}} = 1$ ;  $n_{\text{MBs}} = 251$ ). MBs were formed and cultivated in the presence of 0.1 % (v/v) DMSO (the maximum concentration in culture media containing the inhibitors). Similar average per chip (C, control for DMSO:  $N_{\text{chips}} = 3$ ;  $n_{\text{MBs}} = 644$ ; DMSO 0.1 % (v/v):  $N_{\text{chips}} = 1$ ;  $n_{\text{MBs}} = 195$ ) and distribution of fluorescent signal in the cell layers (D, DMSO 0.1 % (v/v):  $n_{\text{cells}} = 5,982$ ) demonstrated the absence of contribution of 0.1 % (v/v) DMSO in the cell behavior within MBs. (E-F) Flow cytometry analysis of the percentage of COX-2<sup>high</sup> (E) and N-cadherin (F) expressing cells, after MBs dissociation and immunostaining, revealed the presence of several subpopulations expressing different levels of these proteins, however, without any spatial information (at least 5000 cells were analysis for each condition). (G-H) Removing the blocking step during the staining showed that there is no limitation for antibody diffusion. The cells were fixed, permeabilized and then stained only with the secondary antibody, without blocking the samples (G), rendering all immunogenic sites of the MBs accessible. Fluorescent signal distribution in the different cell layers demonstrated higher signal intensity in the core of MBs than in the edge (H, Control:  $N_{\text{chips}} = 13$ ;  $n_{\text{MBs}} = 2,936$ ;  $n_{\text{cells}} = 159,596$ ; Secondary without blocking:  $N_{\text{chips}} = 1$ ;  $n_{\text{MBs}} = 17$ ;  $n_{\text{cells}} = 1,618$ ). (I-K) Quantifying the DAPI signal (I) and clearing the samples (J-K) showed that there was no significant light path alteration in the 3D MBs. (L) The DAPI fluorescent signal distribution inside the MBs displayed a continuous signal increase from the edge ( $r/R = 1$ ) to the core ( $r/R = 0$ ;  $N_{\text{chips}} = 55$ ;  $n_{\text{MBs}} = 10,072$ ;  $n_{\text{cells}} = 699,836$ ), which demonstrated that there is no diffusion limitation of small molecules and that the fluorescent light path is not attenuated by the MB opacity. (J-L) The MBs were subjected to ClearT2 treatment after the immunostaining for COX-2. Representative images (J) showed that the MBs were efficiently cleared post ClearT2, but the distribution of the fluorescent signal intensity was not affected, as demonstrated by a representative MB (K) and the quantification of the distribution of the fluorescent signal after clearing in the different cell layers (L, control COX-2:  $N_{\text{chips}} = 1$ ;  $n_{\text{MBs}} = 23$ ;  $n_{\text{cells}} = 2,366$ ; clearing COX-2:  $N_{\text{chips}} = 1$ ;  $n_{\text{MBs}} = 67$ ;  $n_{\text{cells}} = 6,333$ ). The MBs were recovered from the chip then cryosectioned at 7  $\mu\text{m}$ . For this cell layer depth, there is no antibody diffusion limitation or light path alteration. Here again, the intensity of the COX-2 signal is higher at the edges of the MB than in the central region (M). Alternatively, the MBs were image using a 2-photons microscope and the COX-2 fluorescent signal pattern show similar distribution as wide field imaging, in the median plan (N), cross-section of fluorescence on the x-y and x-z planes (O) or maximal z-projection (P). All scale bars are 50  $\mu\text{m}$ . These results demonstrated the reliability of the measurements by image analysis, ensuring (1) the specificity of the fluorescent labeling; (2) the absence of limitation for antibody diffusion; (3) the absence of the light path alteration in the 3D structures.

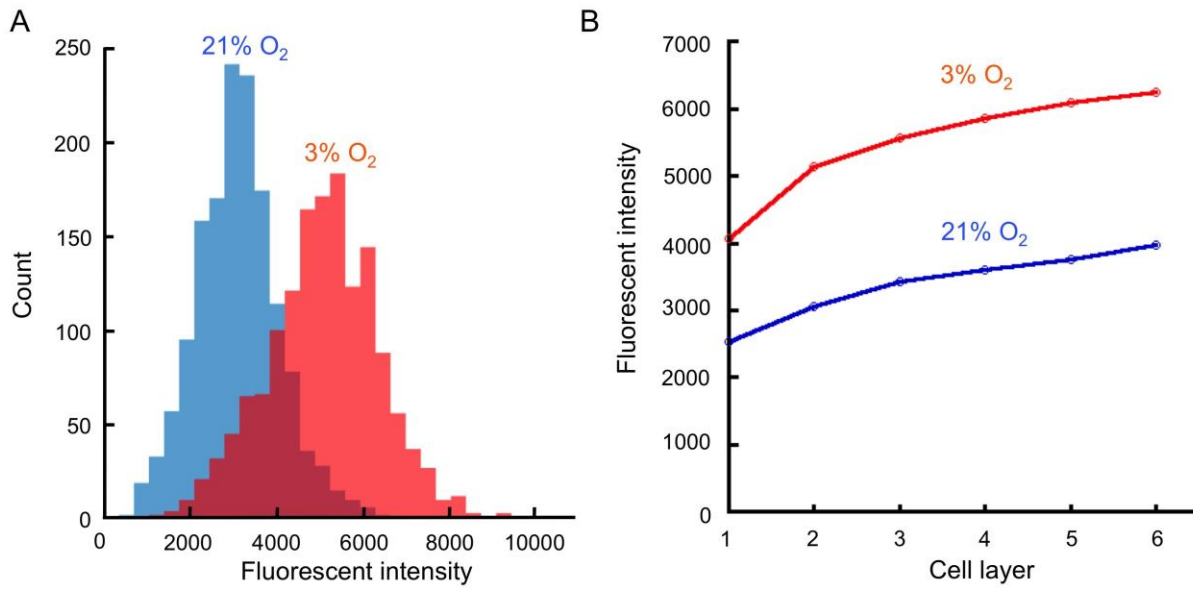

**Fig. S6. Hypoxia analysis within MBs.** Mesenchymal bodies were incubated with Image-iT™ Red Hypoxia Reagent and placed in incubators set up at 21% or 3% O<sub>2</sub>. After 24h, a higher number of cells was positive for Image-iT™ Red Hypoxia Reagent at 3% than at 21% O<sub>2</sub> (**A**). While a slight increase in hypoxia signal was detected in the inner cell layers at 21%O<sub>2</sub>, this fluorescent signal never reached the level measured at 3% O<sub>2</sub>, even in the most outer layers (**B**), demonstrating the absence of hypoxic core in the MBs. The images were acquired using a widefield microscope



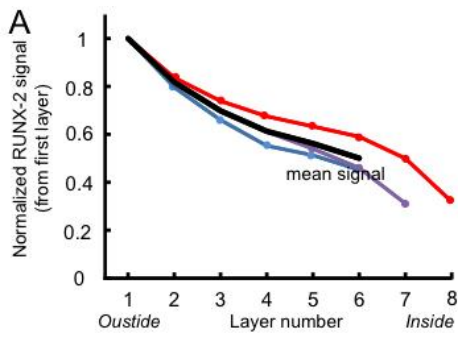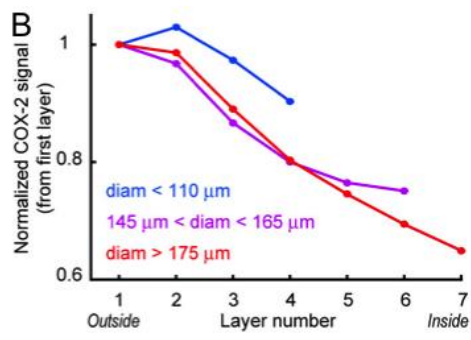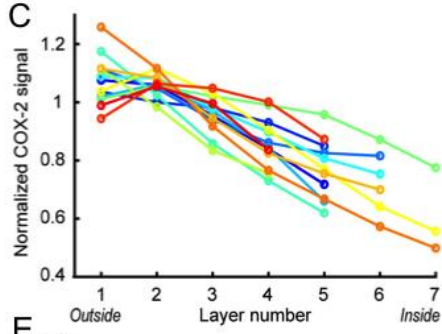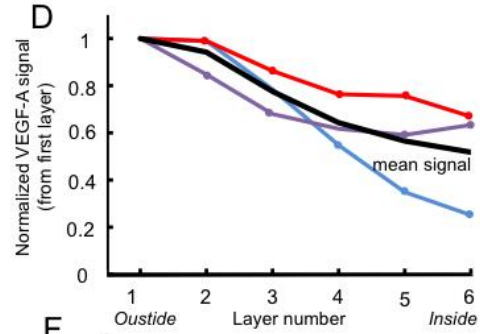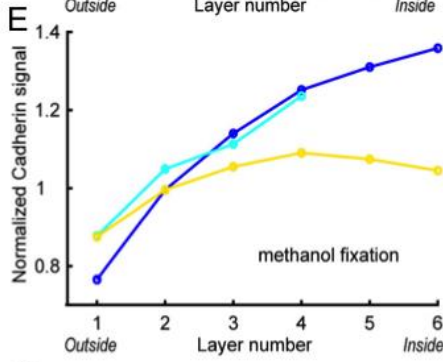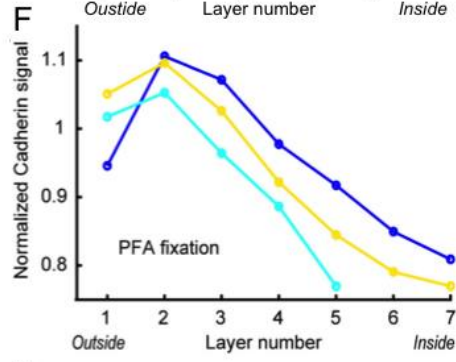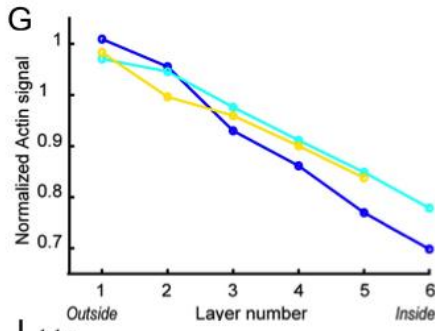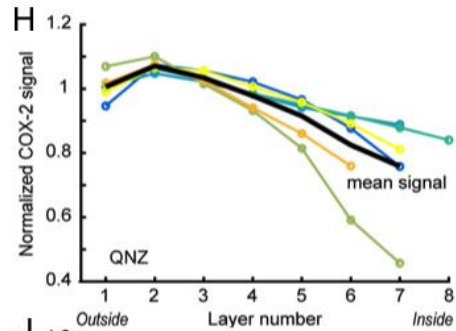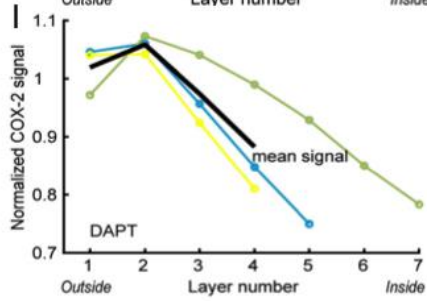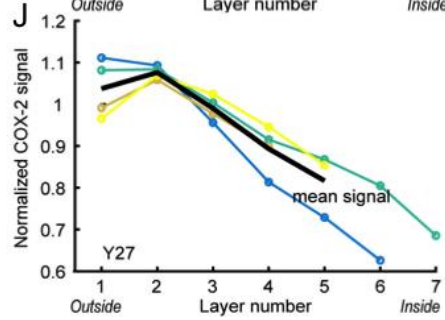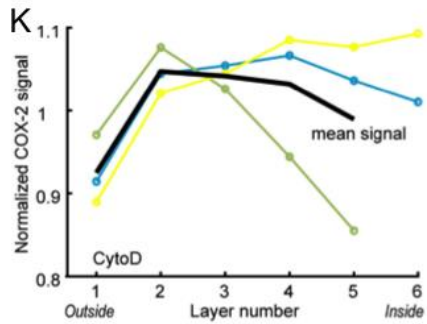

**Fig. S7. Intra-MB fluorescence signal distribution in individual chip.** Evolution of the intra-MB fluorescent signal with control conditions. **(A)** Normalized mean RUNX-2 with the cell layer number, **(B)** Normalized mean COX-2 with the cell layer number for MBs having different sizes ( $N_{\text{chips}} = 13$ ; blue, diameter  $< 110 \mu\text{m}$ ,  $n_{\text{MBs}} = 298$ ,  $n_{\text{cells}} = 9,282$ ; purple,  $145 \mu\text{m} < \text{diameter} < 165 \mu\text{m}$ ,  $n_{\text{MBs}} = 620$ ,  $n_{\text{cells}} = 42,469$ ; red, diameter  $> 175 \mu\text{m}$ ,  $n_{\text{MBs}} = 295$ ,  $n_{\text{cells}} = 26,251$ ) in control conditions. **(C)** Normalized mean COX-2 ( $N_{\text{chips}} = 13$ ,  $n_{\text{MBs}} = 2,936$ ,  $n_{\text{cells}} = 159,596$ ), **(D)** Normalized mean VEGF-A ( $N_{\text{chips}} = 3$ ,  $n_{\text{MBs}} = 413$ ), cadherin **(E)**, with methanol fixation, ( $N_{\text{chips}} = 3$ ,  $n_{\text{MBs}} = 405$ ,  $n_{\text{cells}} = 24,185$ ); **F**, with PFA fixation, ( $N_{\text{chips}} = 3$ ,  $n_{\text{MBs}} = 649$ ,  $n_{\text{cells}} = 47,254$ ) and actin **(G)**, ( $N_{\text{chips}} = 3$ ,  $n_{\text{MBs}} = 421$ ,  $n_{\text{cells}} = 23,970$ ) signals with the cell layer number. Each color represents the mean behavior for one chip. **(H-K)** Evolution of the normalized mean COX-2 signal with the cell layer number depending on the inhibitor: QNZ **(H)**, ( $N_{\text{chips}} = 6$ ,  $n_{\text{MBs}} = 1,215$ ,  $n_{\text{cells}} = 117,443$ ), DAPT **(I)**, ( $N_{\text{chips}} = 3$ ,  $n_{\text{MBs}} = 658$ ,  $n_{\text{cells}} = 37,165$ ), Y27 **(J)**, ( $N_{\text{chips}} = 4$ ,  $n_{\text{MBs}} = 709$ ,  $n_{\text{cells}} = 45,839$ ) or CytoD **(K)**, ( $N_{\text{chips}} = 3$ ,  $n_{\text{MBs}} = 458$ ,  $n_{\text{cells}} = 28,981$ ). Each color represents the mean behavior for one chip. The black lines represent the mean of the single chips. All the images were acquired using a widefield microscope

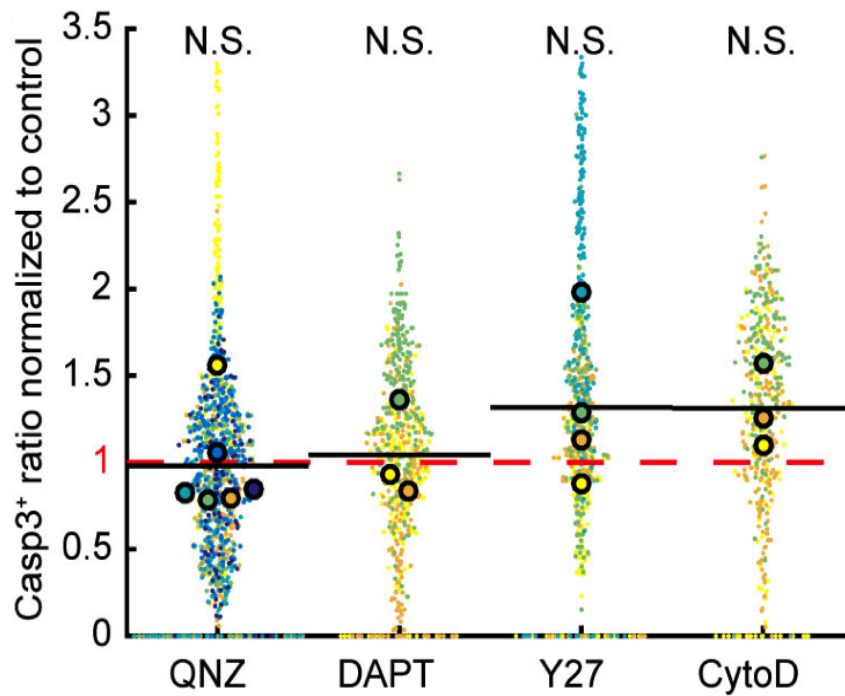

**Fig. S8. Ratio of Casp3<sup>+</sup> cells per MB formed with QNZ ( $n_{\text{MBs}} = 1216$ ), DAPT ( $n_{\text{MBs}} = 658$ ), Y27 ( $n_{\text{MBs}} = 709$ ), and CytoD ( $n_{\text{MBs}} = 458$ ).** For each of these experiments, the results are normalized by the mean of the corresponding control. N.S.: not significant; \*\*:  $p < 0.01$ . The images were acquired using a widefield microscope
